# Supplementary material for: Organized macro-scale membrane size reduction in vanadium redox flow batteries: part 2. Flow-field-informed membrane coverage distribution
Source: Royal Society of Chemistry journal article supplement (doi:10.1039/d4ya00118d), 2024-01-01
Supplement: d4ya00118d4.pdf [file d4ya00118d4.pdf]

## Supporting information

### **Organized Macro-scale Membrane Size Reduction in Vanadium Redox Flow Batteries: Part 2. Flow-field Informed Membrane Coverage Distribution**

Bronston P. Benetho, Abdulmonem Fetyan, Musbaudeen O. Bamgbopa\*

Research & Development Centre, Dubai Electricity and Water Authority (DEWA), P.O. Box  
564, Dubai, United Arab Emirates

\* Corresponding author

E-mail: [musbaudeen.bamgbopa@dewa.gov.ae](mailto:musbaudeen.bamgbopa@dewa.gov.ae) (M. O. Bamgbopa)

Table S1: 3D VRFB cell model properties, parameters, and nominal operating conditions

| Property or Operating Condition                                                    | Value                                         | Ref. |
|------------------------------------------------------------------------------------|-----------------------------------------------|------|
| Cell temperature (K)                                                               | 300                                           | [1]  |
| Electrolyte Bulk diffusion coefficients (m <sup>2</sup> /s) <sup>a</sup>           |                                               |      |
| V <sup>2+</sup>                                                                    | $2.40 \times 10^{-10}$                        | [1]  |
| V <sup>3+</sup>                                                                    | $2.40 \times 10^{-10}$                        | [1]  |
| VO <sup>2+</sup>                                                                   | $3.90 \times 10^{-10}$                        | [1]  |
| VO <sub>2</sub> <sup>+</sup>                                                       | $3.90 \times 10^{-10}$                        | [1]  |
| H <sup>+</sup>                                                                     | $9.31 \times 10^{-9}$                         | [1]  |
| SO <sub>4</sub> <sup>2-</sup>                                                      | $1.07 \times 10^{-9}$                         | [1]  |
| HSO <sub>4</sub> <sup>-</sup>                                                      | $1.33 \times 10^{-9}$                         | [1]  |
| Electrolyte density (kg/m <sup>3</sup> ) +ve   -ve                                 |                                               |      |
|                                                                                    | 1270   1275                                   | [1]  |
| Electrolyte dynamic viscosity (mPa.s) +ve   -ve                                    |                                               |      |
|                                                                                    | 3   3.3                                       | [1]  |
| Electrode conductivity (S/m)                                                       |                                               |      |
|                                                                                    | 4538.4                                        | [1]  |
| Electrode porosity                                                                 |                                               |      |
|                                                                                    | 0.92                                          | [1]  |
| Electrode specific area (m <sup>2</sup> /m <sup>3</sup> )                          |                                               |      |
|                                                                                    | 27062                                         | **   |
| Electrode hydraulic permeability (m <sup>2</sup> )                                 |                                               |      |
|                                                                                    | $8.00 \times 10^{-11}$                        | [1]  |
| Standard reaction potential (V) +ve   -ve                                          |                                               |      |
|                                                                                    | 1.004   -0.255                                | [1]  |
| Reaction rate constant (m/s) +ve   -ve                                             |                                               |      |
|                                                                                    | $2.24 \times 10^{-8}$   $3.00 \times 10^{-8}$ | **   |
| Reaction anodic transfer coefficient +ve   -ve                                     |                                               |      |
|                                                                                    | 0.60   0.50                                   | **   |
| Reaction cathodic transfer coefficient +ve   -ve                                   |                                               |      |
|                                                                                    | 0.20   0.22                                   | **   |
| HSO <sub>4</sub> <sup>-</sup> degree of dissociation constant                      |                                               |      |
|                                                                                    | 0.25                                          | [1]  |
| HSO <sub>4</sub> <sup>-</sup> dissociation reaction rate (mol/(m <sup>3</sup> .s)) |                                               |      |
|                                                                                    | $1.00 \times 10^4$                            | [1]  |
| Species concentration at 50 % SOC and 10 mA/cm <sup>2</sup> (M)                    |                                               |      |
| V <sup>2+</sup>                                                                    | 0.521                                         |      |
| V <sup>3+</sup>                                                                    | 0.513                                         |      |
| VO <sup>2+</sup>                                                                   | 0.530                                         |      |
| VO <sub>2</sub> <sup>+</sup>                                                       | 0.515                                         |      |
| H <sup>+</sup> +ve   -ve                                                           | 5.266   4.737                                 |      |
| HSO <sub>4</sub> <sup>-</sup> +ve   -ve                                            | 3.159   2.842                                 |      |
| Membrane thickness (mm)                                                            |                                               |      |
|                                                                                    | 203                                           | [1]  |
| Membrane porosity                                                                  |                                               |      |
|                                                                                    | 0.28                                          | [1]  |
| Membrane fixed charge concentration (M)                                            |                                               |      |
|                                                                                    | 1.99                                          | [1]  |
| Membrane hydraulic permeability (m <sup>2</sup> )                                  |                                               |      |
|                                                                                    | $1.58 \times 10^{-18}$                        | [1]  |
| Membrane conductivity (S/m)                                                        |                                               |      |
|                                                                                    | 10                                            | [1]  |
| Current collector thickness (cm)                                                   |                                               |      |
|                                                                                    | 6                                             | [1]  |
| Current collector conductivity (S/m)                                               |                                               |      |
|                                                                                    | $1.00 \times 10^4$                            | [1]  |

<sup>a</sup> – Diffusivity values in electrode and membrane domains were obtained using Bruggeman correction of listed values with porosity of respective domains. \*\* – Obtained from fitting experimental (dis)charge data of [1].

Table S2: Concentrations of all active and supporting electrolyte species characterizing different SOC<sub>s</sub> obtained from transient galvanostatic dis(charge) simulation.

| $j$ (mA/cm <sup>2</sup> ) | Negative Electrolyte |           |              |              | Positive Electrolyte |           |               |              | SOC (%) |
|---------------------------|----------------------|-----------|--------------|--------------|----------------------|-----------|---------------|--------------|---------|
|                           | $HSO_4^-$ (M)        | $H^+$ (M) | $V^{2+}$ (M) | $V^{3+}$ (M) | $HSO_4^-$ (M)        | $H^+$ (M) | $VO^{2+}$ (M) | $VO_2^+$ (M) |         |
| 100                       | 2.669                | 4.448     | 0.156        | 0.884        | 3.059                | 5.098     | 0.884         | 0.156        | 15.16   |
|                           | 2.711                | 4.520     | 0.271        | 0.769        | 3.102                | 5.170     | 0.769         | 0.271        | 26.24   |
|                           | 2.748                | 4.580     | 0.369        | 0.671        | 3.139                | 5.232     | 0.671         | 0.369        | 35.64   |
|                           | 2.778                | 4.631     | 0.450        | 0.590        | 3.169                | 5.282     | 0.591         | 0.450        | 43.40   |
|                           | 2.819                | 4.699     | 0.559        | 0.480        | 3.210                | 5.351     | 0.481         | 0.559        | 53.93   |
|                           | 2.884                | 4.807     | 0.732        | 0.308        | 3.275                | 5.459     | 0.309         | 0.732        | 70.50   |
|                           | 2.907                | 4.846     | 0.794        | 0.245        | 3.299                | 5.498     | 0.247         | 0.794        | 76.58   |
| -100                      | 2.907                | 4.846     | 0.794        | 0.245        | 3.299                | 5.498     | 0.247         | 0.794        | 76.28   |
|                           | 2.887                | 4.811     | 0.736        | 0.303        | 3.276                | 5.459     | 0.305         | 0.736        | 70.61   |
|                           | 2.849                | 4.747     | 0.627        | 0.412        | 3.233                | 5.386     | 0.414         | 0.626        | 60.12   |
|                           | 2.829                | 4.714     | 0.569        | 0.469        | 3.209                | 5.347     | 0.473         | 0.568        | 54.55   |
|                           | 2.795                | 4.656     | 0.470        | 0.568        | 3.170                | 5.281     | 0.572         | 0.469        | 45.02   |
|                           | 2.784                | 4.638     | 0.439        | 0.600        | 3.157                | 5.260     | 0.604         | 0.438        | 41.98   |

$SO_4^{2-}$  concentrations obtained from electroneutrality condition.

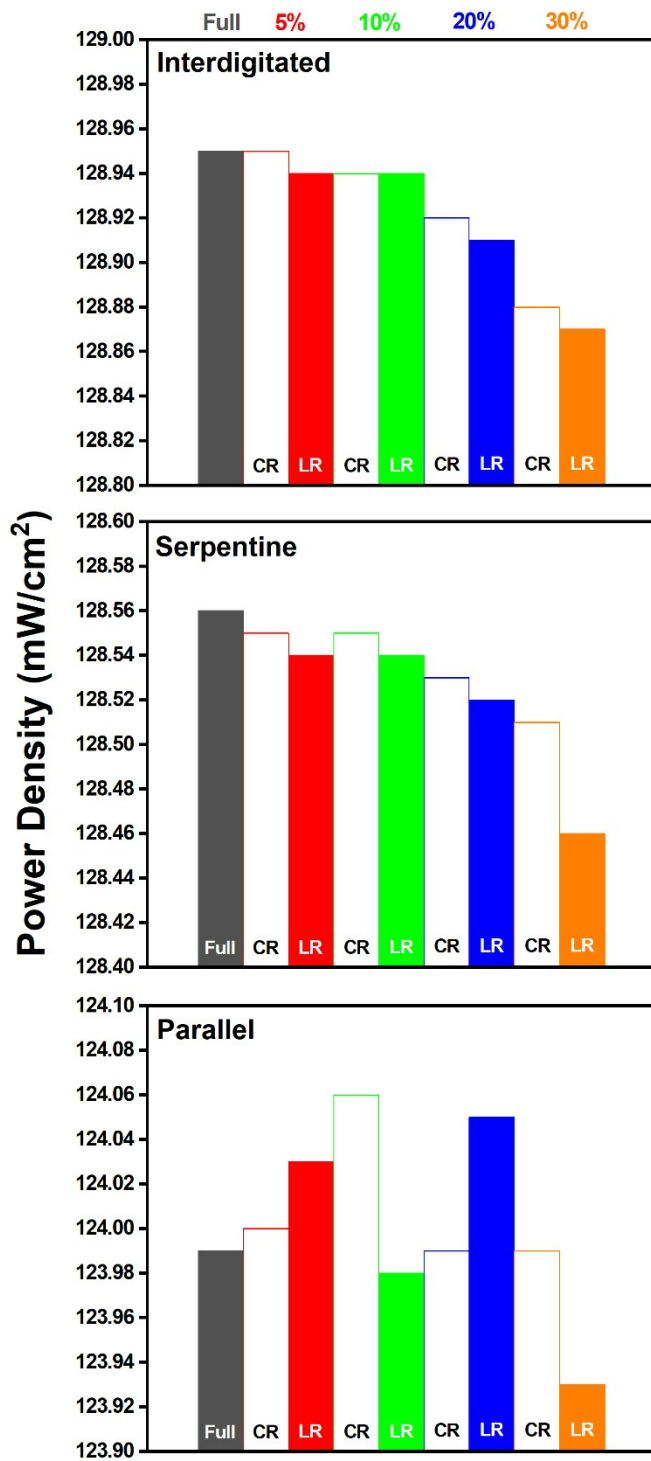

Figure S1: Power density obtained from steady-state discharge polarization simulations of cells adopting interdigitated, parallel, and serpentine flow-fields at 100 mA/cm<sup>2</sup> current density. Showing full membrane coverage, 5 %, 10 %, 20 %, and 30 % total membrane coverage reduction – adjacent to channel, or land. CR: Channel-adjacent membrane reduction MEA architecture, LR: land-adjacent membrane reduction MEA architecture.

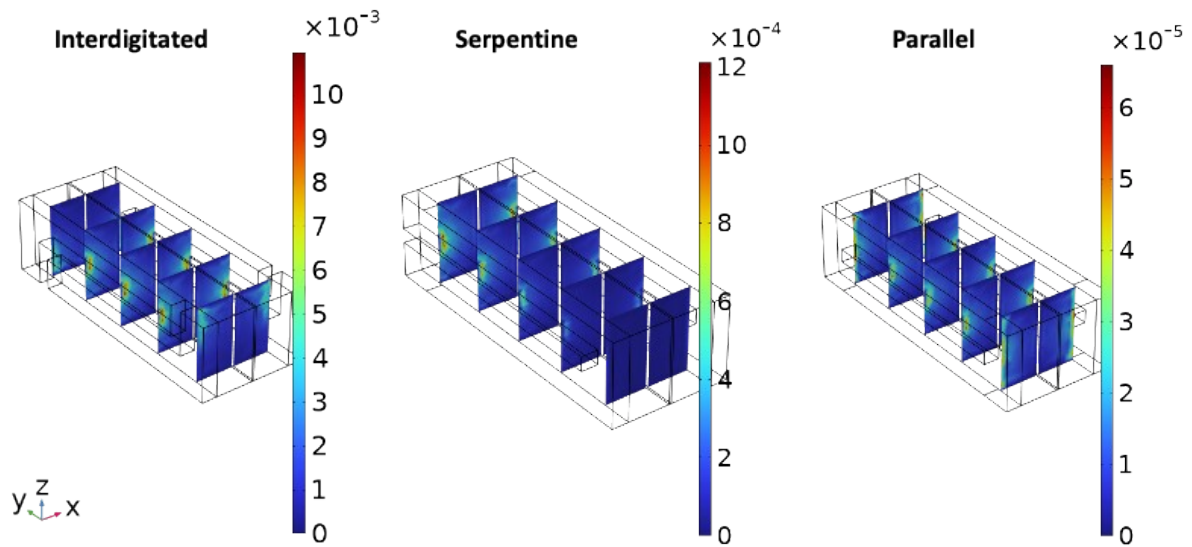

Figure S2: Electrolyte velocity magnitude in the electrodes enforced by the different flow fields at the same nominal flow rate. Negative electrode left and positive right.

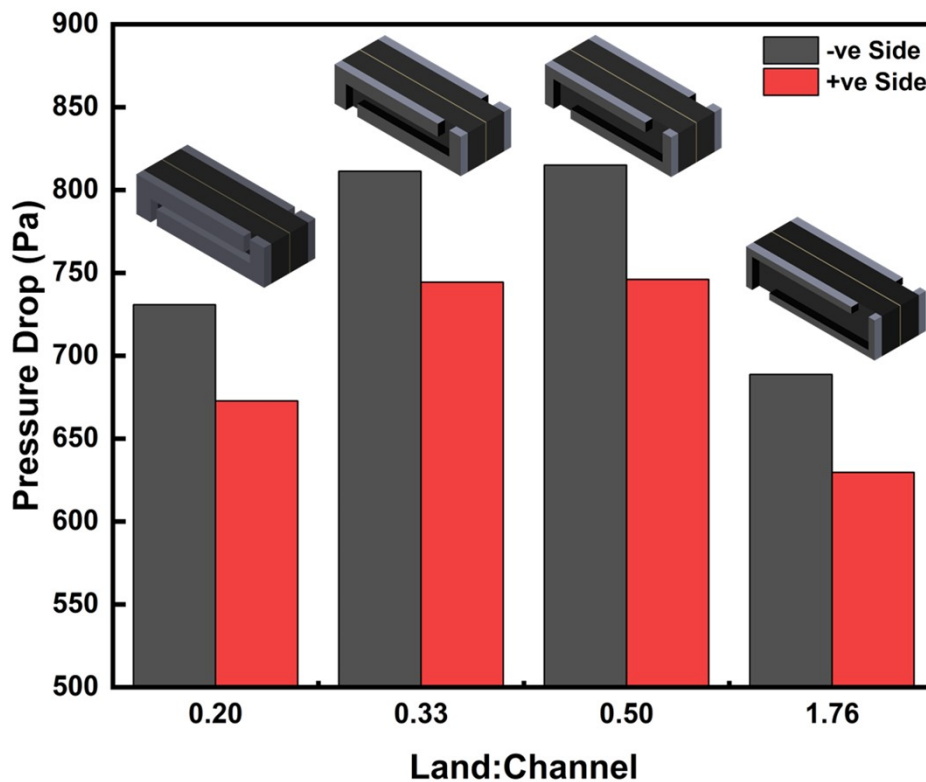

Figure S3: Pressure drop across full membrane coverage interdigitated cell unit with increasing land-to-channel ratios.

## References

- [1] K. Knehr, E. Agar, C. Dennison, A. Kalidindi, E. Kumbur, A transient vanadium flow battery model incorporating vanadium crossover and water transport through the membrane, *Journal of The Electrochemical Society*. 159 (2012) A1446–A1459.
