# Supplementary figures and images for: Organized macro-scale membrane size reduction in vanadium redox flow batteries: part 2. Flow-field-informed membrane coverage distribution
Source: Royal Society of Chemistry journal article supplement (doi:10.1039/d4ya00118d), 2024-01-01

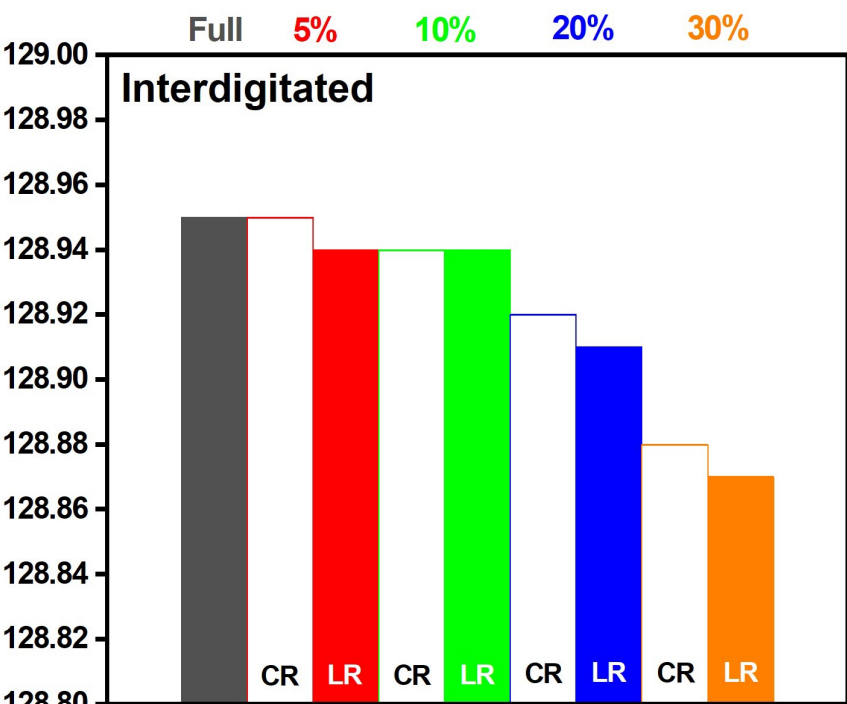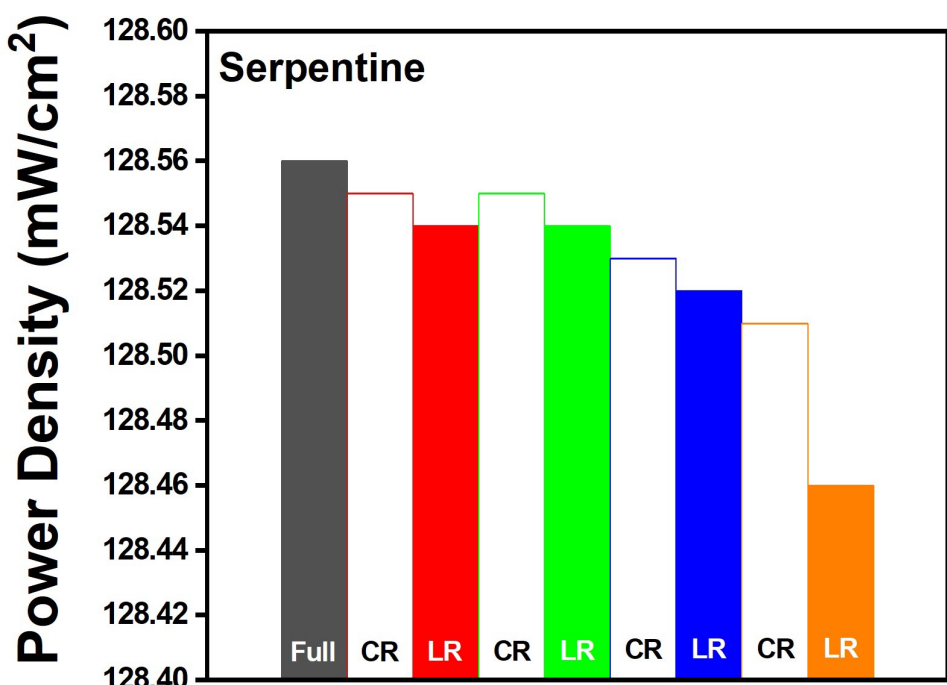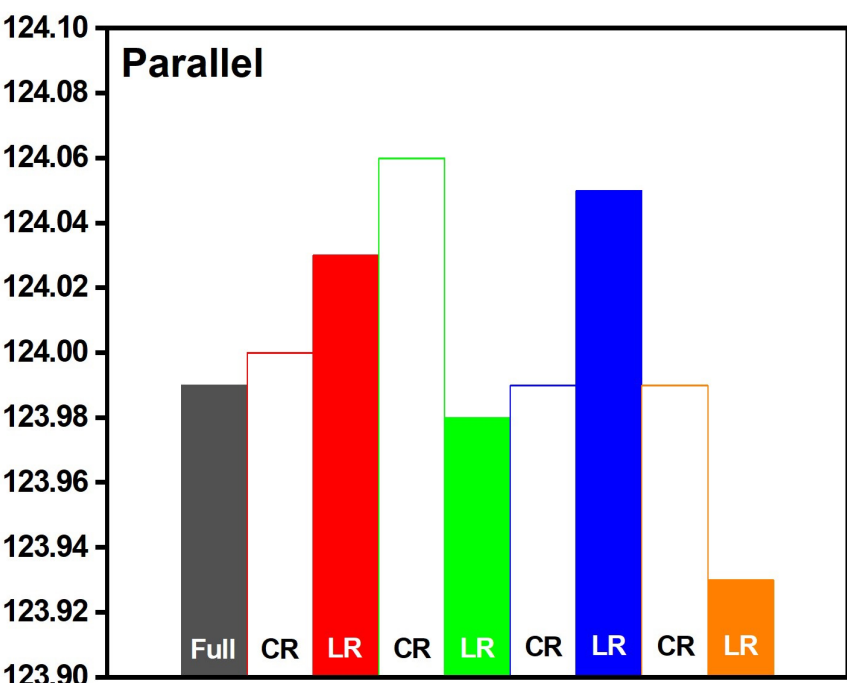

Supplement: d4ya00118d1.pdf [file d4ya00118d1.pdf]

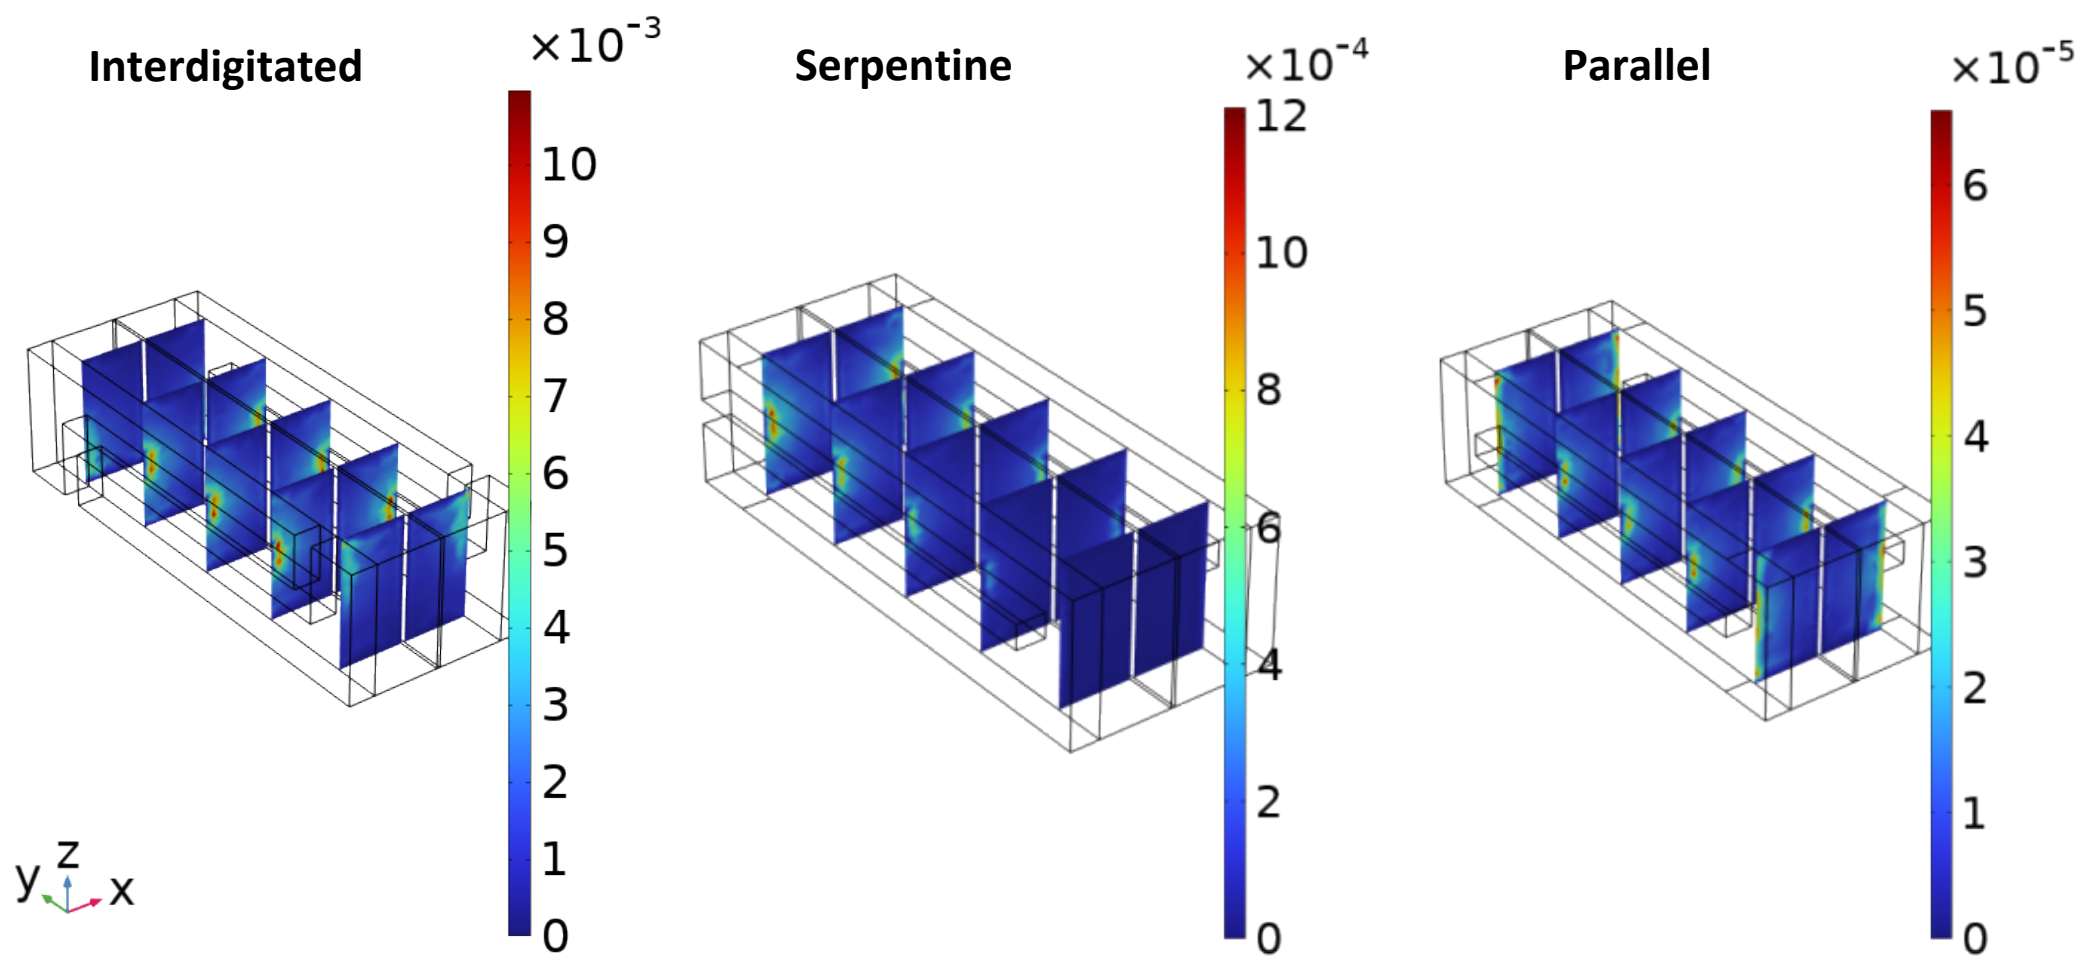

Supplement: d4ya00118d2.pdf [file d4ya00118d2.pdf]

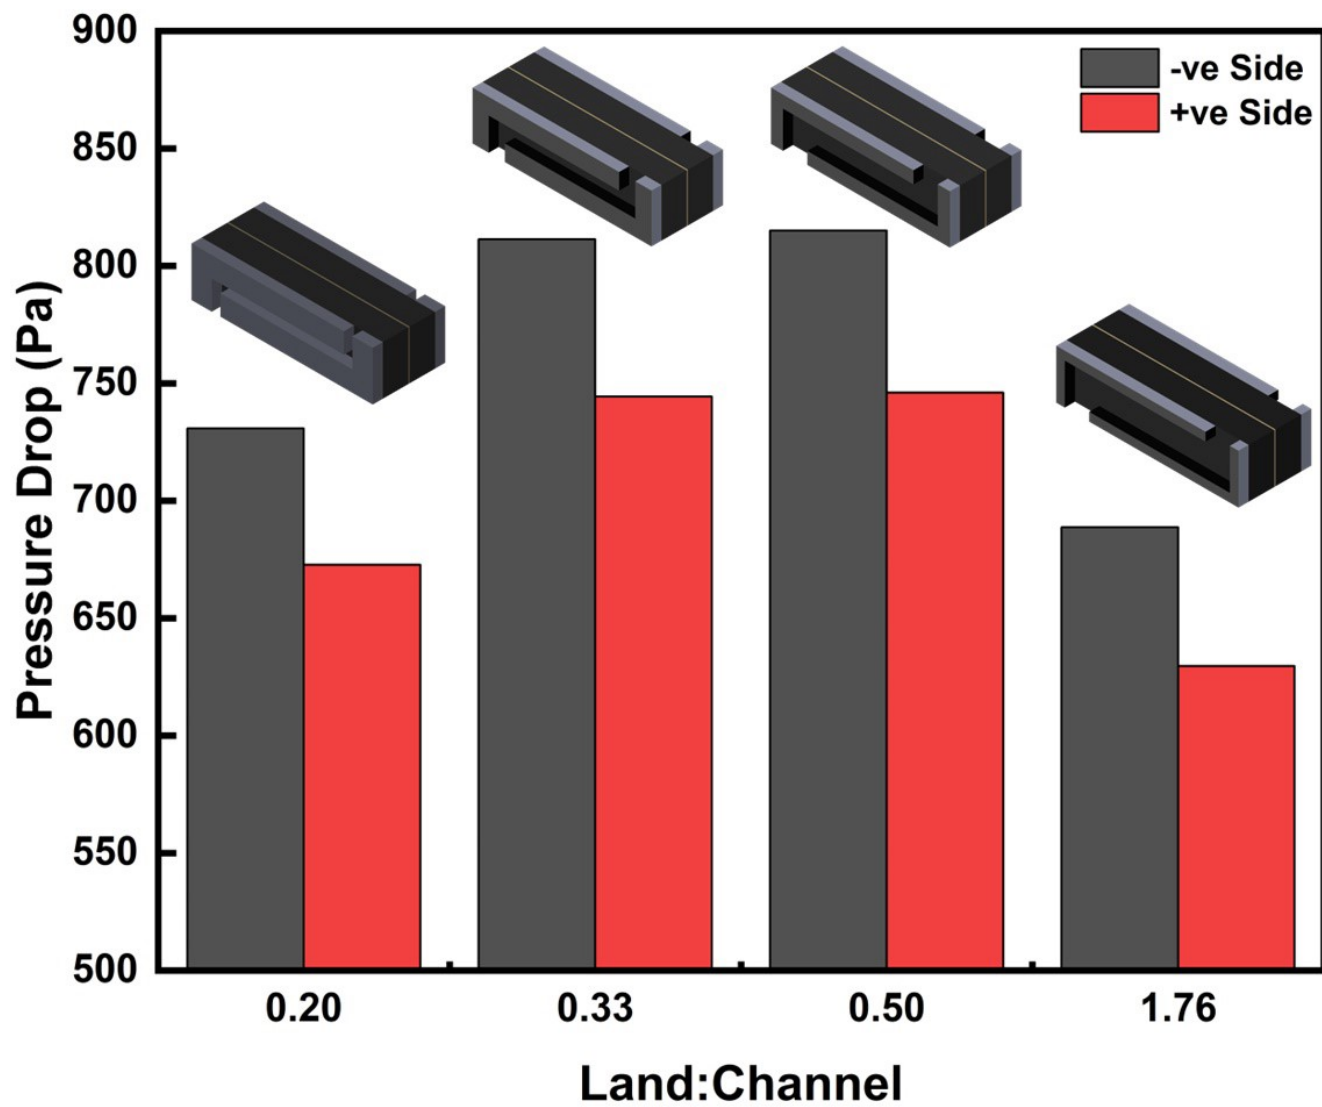

Supplement: d4ya00118d3.pdf [file d4ya00118d3.pdf]
